# Supplementary material
Source: PubMed Central journal article supplement (PMC6879858)
Supplement: NIHMS1539812-supplement-1.pdf [file NIHMS1539812-supplement-1.pdf]

Supplement for:

**Cyclophilin A protects HIV-1 from restriction by human TRIM5 $\alpha$**

Kyusik Kim, Ann Dauphin, Sevnur Komurlu, Sean M. McCauley, Leonid A. Yurkovetskiy, Claudia Carbone, William E. Diehl, Caterina Strambio-De-Castillia, Edward M. Campbell, and Jeremy Luban

**Including:**

**Supplementary Tables 1, 2, and 3 with Supplementary References**

**Supplementary Table 1. Plasmids used in this study.**

| <b>Plasmid Name</b>                                          | <b>Purpose</b>                                        | <b>Notes</b>                                                                                                                                                                    | <b>Source</b>   |
|--------------------------------------------------------------|-------------------------------------------------------|---------------------------------------------------------------------------------------------------------------------------------------------------------------------------------|-----------------|
| pAIP-hGMCSF-co <sup>1,2</sup>                                | Stable 293 cell line expressing human cytokine GM-CSF | SFFV promoter expresses codon-optimized human GM-CSF and puromycin N-acetyltransferase                                                                                          | Addgene #74168  |
| pAIP-hIL4-co <sup>1,2</sup>                                  | Stable 293 cell line expressing human cytokine IL4    | SFFV promoter expresses codon-optimized human IL4 and puromycin N-acetyltransferase                                                                                             | Addgene #74169  |
| pSIV- $\Delta$ psi/ $\Delta$ env/ $\Delta$ Vif/ $\Delta$ Vpr | SIV <sub>MAC251</sub> <i>gag-pol/vpx</i>              | Production of SIV-VLPs containing Vpx protein                                                                                                                                   | Addgene #132928 |
| pMD2.G                                                       | VSV Glycoprotein                                      | Pseudotype HIV-1 vectors with VSV Glycoprotein                                                                                                                                  | Addgene #12259  |
| psPAX2                                                       | HIV-1 <i>gag-pol</i>                                  | Encodes gag structural proteins and pol enzymes to generate virion particles to generate 3-part lentiviral vector                                                               | Addgene #12260  |
| p8.9 N $\Delta$ SB <sup>3</sup>                              | HIV-1 <i>gag-pol</i>                                  | Minimal HIV-1 packaging plasmid for gag and pol expression                                                                                                                      | Addgene #132929 |
| p8.9 N $\Delta$ SB P90A <sup>4</sup>                         | HIV-1 <i>gag-pol</i>                                  | p8.9 N $\Delta$ SB bearing P90A mutant capsid sequence                                                                                                                          | Addgene #132930 |
| p8.9 N $\Delta$ SB D185K / D186L <sup>4</sup>                | HIV-1 <i>gag-pol</i>                                  | p8.9 N $\Delta$ SB bearing RT-D185K/D186L mutant reverse transcriptase sequence                                                                                                 | Addgene #132931 |
| pALPS GFP <sup>2</sup>                                       | GFP reporter of lentiviral vector                     | SFFV promoter expresses GFP                                                                                                                                                     | Addgene #101323 |
| pWPTS GFP <sup>4</sup>                                       | Lentivector for quantification of HIV-1 cDNA          | Contains a unique loxP sequence within a region of the 3' LTR U3. EF1 $\alpha$ promoter expresses GFP                                                                           | Addgene #12255  |
| pAPM-D4-miR30-L1221 <sup>5</sup>                             | Lentivector for luciferase (control) knockdown        | SFFV promoter expresses puromycin N-acetyltransferase and miR30-based shRNA targeting luciferase. Target sequence: 5'-TACAAACGCTCTCATCGACAAG-3'; negative control for knockdown | Addgene #115846 |
| pAPM-D4-miR30-TRIM5                                          | Lentivector for TRIM5 knockdown                       | SFFV promoter expresses puromycin N-acetyltransferase and miR30-based shRNA targeting TRIM5. Target sequence: 5'-TGCCAAGCATGCCTCACTGCAA-3'                                      | Addgene #132932 |
| pABM-D4-miR30-L1221                                          | Lentivector for luciferase (control) knockdown        | SFFV promoter expresses blasticidin S-deaminase and miR30-based shRNA targeting luciferase. Target sequence: 5'-TACAAACGCTCTCATCGACAAG-3'; negative control for knockdown       | Addgene #132933 |

|                                   |                                                                                                            |                                                                                                                                                                                                  |                                                                      |
|-----------------------------------|------------------------------------------------------------------------------------------------------------|--------------------------------------------------------------------------------------------------------------------------------------------------------------------------------------------------|----------------------------------------------------------------------|
| pABM-D4-miR30-CypA                | Lentivector for CypA knockdown                                                                             | SFFV promoter expresses blasticidin S-deaminase and miR30-based shRNA targeting cyclophilin A. Target sequence: 5'-CTGGATTGCAGAGTTAAGTTTA-3'                                                     | Addgene #132934                                                      |
| pPU-Empty-miR30-L1221             | All-in-one knockdown-rescue lentivector for luciferase (control) knockdown                                 | SFFV promoter expresses puromycin N-acetyltransferase and miR30-based shRNA targeting luciferase. Target sequence: 5'-TACAAACGCTCTCATCGACAAG-3'; negative control in knockdown-rescue experiment | Addgene #132935                                                      |
| pPU-Empty-miR30-TRIM5             | All-in-one knockdown-rescue lentivector for TRIM5 knockdown                                                | SFFV promoter expresses puromycin N-acetyltransferase and miR30-based shRNA targeting TRIM5. Target sequence: 5'-TGCCAAGCATGCCTCACTGCAA-3'                                                       | Addgene #132936                                                      |
| pPU-huTRIM5 $\alpha$ -miR30-L1221 | All-in-one knockdown-rescue lentivector for huTRIM5 $\alpha$ expression and luciferase (control) knockdown | SFFV promoter expresses puromycin N-acetyltransferase, exogenous huTRIM5 $\alpha$ protein and miR30-based shRNA targeting luciferase. Target sequence: 5'-TACAAACGCTCTCATCGACAAG-3'              | Addgene #132937                                                      |
| pPU-huTRIM5 $\alpha$ -miR30-TRIM5 | All-in-one knockdown-rescue lentivector for huTRIM5 $\alpha$ expression and TRIM5 knockdown                | SFFV promoter expresses puromycin N-acetyltransferase, exogenous huTRIM5 $\alpha$ protein and miR30-based shRNA targeting TRIM5. Target sequence: 5'-TGCCAAGCATGCCTCACTGCAA-3'                   | Addgene #132938                                                      |
| pNL4-3/Mac-tropic Env             | Full-length infectious HIV-1 <sub>MAC</sub>                                                                | Encodes HIV-1 <sub>NL4-3</sub> proviral sequences containing macrophage-tropic JR-FL <i>env</i>                                                                                                  | Neagu et al., 2009 <sup>6</sup>                                      |
| pLXIN GFP                         | GFP reporter of MLV-based vector                                                                           | MLV-based transfer vector expressing GFP and neomycin resistance protein                                                                                                                         | Addgene #132940                                                      |
| pCIG3 N <sup>7</sup>              | N-tropic MLV <i>gag-pol</i>                                                                                | MLV packaging plasmid for N-tropic MLV <i>gag-pol</i> expression                                                                                                                                 | Addgene #132941                                                      |
| pCIG3 B <sup>7</sup>              | B-tropic MLV <i>gag-pol</i>                                                                                | MLV packaging plasmid for B-tropic MLV <i>gag-pol</i> expression                                                                                                                                 | Addgene #132942                                                      |
| pUC57mini ZM249M                  | HIV-1 clade C molecular clone                                                                              | Molecular clone of transmitted/founder virus HIV-1 <sub>ZM249M</sub>                                                                                                                             | Salazar-Gonzalez et al., 2009 <sup>8</sup> ; NIH AIDS Reagent #12416 |
| pUC57mini ZM249M                  | HIV-1 clade C molecular clone                                                                              | Molecular clone of transmitted/founder virus HIV-1 <sub>ZM249M</sub> bearing P90A capsid                                                                                                         | Salazar-Gonzalez et                                                  |

|                                                           |                                  |                                                                                                                                                                                                                         |                                                           |
|-----------------------------------------------------------|----------------------------------|-------------------------------------------------------------------------------------------------------------------------------------------------------------------------------------------------------------------------|-----------------------------------------------------------|
| P90A                                                      |                                  | mutation                                                                                                                                                                                                                | al., 2009 <sup>8</sup> ;<br>NIH AIDS<br>Reagent<br>#12416 |
| pUC57mini<br>ZM249M<br>$\Delta$ env eGFP <sup>2,8</sup>   | HIV-1 clade C<br>molecular clone | Molecular clone of transmitted/founder<br>virus HIV-1 <sub>ZM249M</sub> <sup>8</sup> with deletion of 79<br>nucleotides following the env signal<br>peptide and GFP in place of nef                                     | Addgene<br>#101321                                        |
| pUC57mini<br>ZM249M<br>P90A $\Delta$ env<br>eGFP          | HIV-1 clade C<br>molecular clone | Molecular clone of transmitted/founder<br>virus HIV-1 <sub>ZM249M</sub> <sup>8</sup> containing P90A<br>capsid mutation, with deletion of 79<br>nucleotides following the env signal<br>peptide and GFP in place of nef | Addgene<br>#132939                                        |
| pUC57mini<br>Z331M-TF<br>$\Delta$ env eGFP <sup>2,9</sup> | HIV-1 clade C<br>molecular clone | Molecular clone of transmitted/founder<br>virus HIV-1 <sub>Z331M-TF</sub> <sup>9</sup> with deletion of 79<br>nucleotides following the env signal<br>peptide and GFP in place of nef                                   | Addgene<br>#101320                                        |

**Supplementary Table 2. Drugs and reagents.**

| <b>Reagents</b>                               | <b>Source</b>               | <b>Identifier</b> |
|-----------------------------------------------|-----------------------------|-------------------|
| DMEM, high glucose                            | ThermoFisher                | 11995073          |
| Fetal Bovine Serum                            | GE Healthcare Life Sciences | SH30087.03        |
| RPMI-1640                                     | ThermoFisher                | 11875119          |
| Human AB+ Serum                               | Omega Scientific            | HS-20             |
| HEPES                                         | Corning                     | 25-060-CI         |
| MEM Non-Essential Amino Acids                 | Corning                     | 25-025-CI         |
| Sodium Pyruvate                               | Corning                     | 25-000-CI         |
| GlutaMAX™-I                                   | ThermoFisher                | 35050-061         |
| Opti-MEM                                      | ThermoFisher                | 31985-062         |
| TransIT-LT1                                   | Mirus Bio                   | MIR2306           |
| BD Cytotfix Fixation Buffer                   | BD Bioscience               | 554655            |
| cOmplete mini protease inhibitor              | Roche                       | 11836170001       |
| 2-mercaptoethanol                             | Invitrogen                  | 21985-023         |
| Laemmli Buffer                                | BioRad                      | 161-0737          |
| 4-20% gradient SDS-PAGE gels, 12 well         | BioRad                      | 456-1095          |
| 0.45 mM nitrocellulose membrane               | BioRad                      | 162-0112          |
| TBS Odyssey Blocking Buffer                   | Li-Cor                      | 927-50000         |
| Pierce™ 16% Formaldehyde (w/v), Methanol-free | ThermoFisher                | 28906             |
| PIPES                                         | Sigma-Aldrich               | P1851             |
| Phalloidin (FITC)                             | Enzo Life Science           | ALX-350-268-MC01  |
| Hoeschst 33342                                | Invitrogen                  | H3570             |
| Cyclosporine A                                | Sigma-Aldrich               | 30024             |
| Cyclosporine H                                | Sigma-Aldrich               | SML1575           |
| GS-CypAi3                                     | Gilead                      | Non-commercial    |
| GS-CypAi48                                    | Gilead                      | Non-commercial    |
| MG132                                         | Sigma-Aldrich               | M7449             |

**Supplementary Table 3. qPCR primers and probes for Late RT quantification.**

| <b>Primer or Probe name</b> | <b>Sequence</b>                              | <b>Note</b>                        |
|-----------------------------|----------------------------------------------|------------------------------------|
| pWPT J1B Fwd                | 5'-GCATACATTATACGAAGTTATGCTGC-3'             | Primer to detect late RT product   |
| pWPT J2 Rev                 | 5'-GCCGTGCGCGCTTCAGCAAGC-3'                  | Primer to detect late RT product   |
| LRT-P (Probe)               | 5'-(FAM)-CAGTGGCGCCCGAACAGGGA-(TAMRA)-3'     | Probe to detect late RT product    |
| MH533                       | 5'-ACCCACTCCCTCTTAGCCAATATT-3'               | Primer to detect mitochondrial DNA |
| MH534                       | 5'-GTAGGGCTAGGCCACCG-3'                      | Primer to detect mitochondrial DNA |
| Mito-P (Probe)              | 5'-(FAM) CTAGTCTTTGCCGCCTGCGAAGCA (TAMRA)-3' | Probe to detect mitochondrial DNA  |

## References

1. Pertel, T., Hausmann, S., Morger, D., Züger, S., Guerra, J., Lascano, J., Reinhard, C., Santoni, F. A., Uchil, P. D., Chatel, L., Bisiaux, A., Albert, M. L., Strambio-De-Castillia, C., Mothes, W., Pizzato, M., Grütter, M. G. & Luban, J. TRIM5 is an innate immune sensor for the retrovirus capsid lattice. *Nature* 472, 361–365 (2011).
2. McCauley, S. M., Kim, K., Nowosielska, A., Dauphin, A., Yurkovetskiy, L., Diehl, W. E. & Luban, J. Intron-containing RNA from the HIV-1 provirus activates type I interferon and inflammatory cytokines. *Nat. Commun.* 9, 5305 (2018).
3. Berthoux, L., Sebastian, S., Sokolskaja, E. & Luban, J. Lv1 inhibition of human immunodeficiency virus type 1 is counteracted by factors that stimulate synthesis or nuclear translocation of viral cDNA. *J. Virol.* 78, 11739–11750 (2004).
4. De Iaco, A. & Luban, J. Inhibition of HIV-1 infection by TNPO3 depletion is determined by capsid and detectable after viral cDNA enters the nucleus. *Retrovirology* 8, 98 (2011).
5. Yurkovetskiy, L., Guney, M. H., Kim, K., Goh, S. L., McCauley, S., Dauphin, A., Diehl, W. E. & Luban, J. Primate immunodeficiency virus proteins Vpx and Vpr counteract transcriptional repression of proviruses by the HUSH complex. *Nat Microbiol* 3, 1354–1361 (2018).
6. Neagu, M. R., Ziegler, P., Pertel, T., Strambio-De-Castillia, C., Grütter, C., Martinetti, G., Mazzucchelli, L., Grütter, M., Manz, M. G. & Luban, J. Potent inhibition of HIV-1 by TRIM5-cyclophilin fusion proteins engineered from human components. *J. Clin. Invest.* 119, 3035–3047 (2009).
7. Bock, M., Bishop, K. N., Towers, G. & Stoye, J. P. Use of a transient assay for studying the genetic determinants of Fv1 restriction. *J. Virol.* 74, 7422–7430 (2000).
8. Salazar-Gonzalez, J. F., Salazar, M. G., Keele, B. F., Learn, G. H., Giorgi, E. E., Li, H., Decker, J. M., Wang, S., Baalwa, J., Kraus, M. H., Parrish, N. F., Shaw, K. S., Guffey, M. B., Bar, K. J., Davis, K. L., Ochsenbauer-Jambor, C., Kappes, J. C., Saag, M. S., Cohen, M. S., Mulenga, J., Derdeyn, C. A., Allen, S., Hunter, E., Markowitz, M., Hraber, P., Perelson, A. S., Bhattacharya, T., Haynes, B. F., Korber, B. T., Hahn, B. H. & Shaw, G. M. Genetic identity, biological phenotype, and

evolutionary pathways of transmitted/founder viruses in acute and early HIV-1 infection. *J. Exp. Med.* 206, 1273–1289 (2009).

9. Deymier, M. J., Ende, Z., Fenton-May, A. E., Dilernia, D. A., Kilembe, W., Allen, S. A., Borrow, P. & Hunter, E. Heterosexual Transmission of Subtype C HIV-1 Selects Consensus-Like Variants without Increased Replicative Capacity or Interferon- $\alpha$  Resistance. *PLoS Pathog.* 11, e1005154 (2015).
